# Supplementary material for: Effects of post-exercise cold-water immersion on performance and perceptive outcomes of competitive adolescent swimmers
Source: Springer Nature journal article supplement (doi:10.1007/s00421-024-05462-x), 2024-03-28
Supplement: MOESM1 [file 26917330]

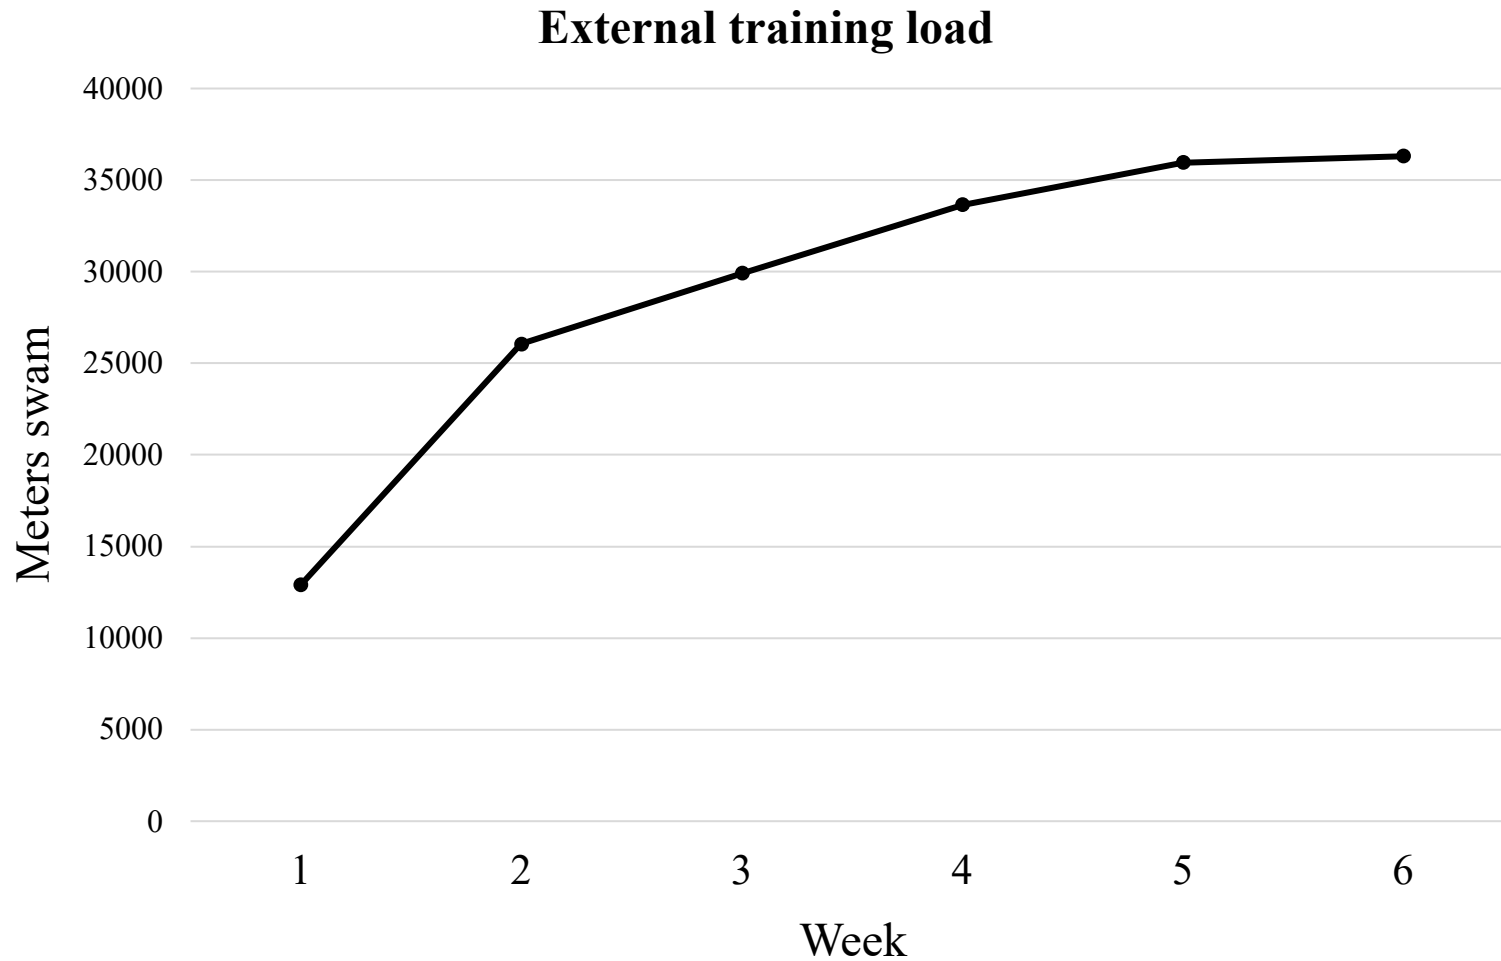

**Supplementary file 1.** Weekly external training loads.
