# Supplementary material for: Effects of post-exercise cold-water immersion on performance and perceptive outcomes of competitive adolescent swimmers
Source: Springer Nature journal article supplement (doi:10.1007/s00421-024-05462-x), 2024-03-28
Supplement: MOESM2 [file 26917330]

**Supplementary file 2** Repeated measures analysis of variance (ANOVA) comparing weekly rating of perceived exertion (wRPE) between interventions.

| <b>CWI</b> |              | <b>TWI</b> |              | <b>PAS</b> |              | <b>ANOVA</b>        |             |                    |
|------------|--------------|------------|--------------|------------|--------------|---------------------|-------------|--------------------|
| Baseline   | Intervention | Baseline   | Intervention | Baseline   | Intervention | <b>Intervention</b> | <b>Time</b> | <b>Interaction</b> |
| week       | week         | week       | week         | week       | week         |                     |             |                    |
| 4642.8 ±   | 4415.6 ±     | 4661.1 ±   | 5061.8 ±     | 4477.8 ±   | 4829.3 ±     | p = .634            | p = .419    | p = .401           |
| 1371.1     | 941.0        | 1505.6     | 1067.0       | 1473.4     | 1256.5       |                     |             |                    |

*CWI* Cold-water immersion, *TWI* thermoneutral water immersion, *PAS* passive recovery
